# Supplementary material
Source: PubMed Central journal article supplement (PMC8011667)
Supplement: ehp8222.s001.acco.pdf [file ehp8222.s001.acco.pdf]

**Note to readers with disabilities:** *EHP* strives to ensure that all journal content is accessible to all readers. However, some figures and Supplemental Material published in *EHP* articles may not conform to [508 standards](#) due to the complexity of the information being presented. If you need assistance accessing journal content, please contact [ehp508@niehs.nih.gov](mailto:ehp508@niehs.nih.gov). Our staff will work with you to assess and meet your accessibility needs within 3 working days.

### **Supplemental Material**

#### **Effect of Epidermal Growth Factor Treatment and Polychlorinated Biphenyl Exposure in a Dietary-Exposure Mouse Model of Steatohepatitis**

Josiah E. Hardesty, Banrida Wahlang, Russell A. Prough, Kim Z. Head, Daniel Wilkey, Michael Merchant, Hongxue Shi, Jian Jin, and Matthew C. Cave

#### **Table of Contents**

**Table S1.** PCB Congener Composition of Aroclor1260 (Adapted from ATSDR CDC).

**Table S2.** Taqman Probes.

**Table S3.** Antibodies.

**Table S4.** Outliers for each measure and figure.

**Table S5.** p-values.

**Table S6.** Numerical Data.

**Figure S1.** Effects of acute EGF and chronic EGF and Aroclor1260 exposure on hepatic EGFR signaling.

**Figure S2.** Effects of chronic EGF and Aroclor 1260 exposure on fasted glucose levels at 6 and 12 hours.

**Figure S3.** Effects of chronic EGF and Aroclor 1260 exposure on hepatic FXR and AhR expression and target genes.

**Figure S4.** Effect of chronic EGF and A1260 exposure on hepatic phosphoproteomic targets.

**Additional File-** Excel Document

**Table S1. PCB Congener Composition of Aroclor1260 (Adapted from ATSDR CDC)**

| PCB Congener | % of Aroclor1260 |
|--------------|------------------|--------------|------------------|--------------|------------------|--------------|------------------|
| 181          | 11.38            | 196          | 0.84             | 192          | 0.17             | 16           | 0.02             |
| 154          | 9.39             | 179          | 0.83             | 130          | 0.14             | 54           | 0.02             |
| 150          | 8.75             | 191          | 0.82             | 209          | 0.13             | 58           | 0.02             |
| 139          | 6.54             | 173          | 0.7              | 86           | 0.11             | 68           | 0.02             |
| 188          | 5.4              | 165          | 0.69             | 174          | 0.1              | 138          | 0.02             |
| 175          | 4.96             | 145          | 0.61             | 190          | 0.1              | 158          | 0.02             |
| 171          | 4.11             | 177          | 0.59             | 199          | 0.1              | 5            | 0.01             |
| 102          | 3.13             | 159          | 0.58             | 206          | 0.1              | 14           | 0.01             |
| 152          | 3.04             | 186          | 0.55             | 98           | 0.09             | 15           | 0.01             |
| 133          | 2.9              | 129          | 0.53             | 132          | 0.07             | 21           | 0.01             |
| 142          | 2.62             | 194          | 0.53             | 134          | 0.07             | 31           | 0.01             |
| 178          | 2.57             | 207          | 0.53             | 198          | 0.07             | 36           | 0.01             |
| 97           | 2.45             | 157          | 0.52             | 17           | 0.05             | 40           | 0.01             |
| 164          | 2.42             | 119          | 0.48             | 76           | 0.05             | 47           | 0.01             |
| 184          | 2.41             | 89           | 0.41             | 208          | 0.05             | 66           | 0.01             |
| 195          | 2.07             | 135          | 0.34             | 7            | 0.04             | 73           | 0.01             |
| 180          | 2.03             | 203          | 0.33             | 30           | 0.04             | 85           | 0.01             |
| 200          | 1.78             | 94           | 0.3              | 62           | 0.04             | 87           | 0.01             |
| 137          | 1.46             | 201          | 0.25             | 72           | 0.04             | 93           | 0.01             |
| 204          | 1.4              | 50           | 0.24             | 100          | 0.04             | 110          | 0.01             |
| 111          | 1.33             | 202          | 0.24             | 27           | 0.03             | 125          | 0.01             |
| 147          | 1.15             | 106          | 0.22             | 32           | 0.03             | 182          | 0.01             |
| 172          | 1.11             | 131          | 0.22             | 42           | 0.03             | 16           | 0.02             |
| 197          | 1.09             | 168          | 0.19             | 0            | 0.02             |              |                  |
| 136          | 1.08             | 176          | 0.17             | 3            | 0.02             |              |                  |

**Table S2: Taqman Probes**

| Taqman Probe ID | Gene                           |
|-----------------|--------------------------------|
| Mm00445168_m1   | <i>Abcb11</i>                  |
| Mm01545150_m1   | <i>Apob</i>                    |
| Mm01307193_g1   | <i>Apoe</i>                    |
| Mm00478932_m1   | <i>Ahr</i>                     |
| Mm01283978_m1   | <i>Car</i>                     |
| Mm03047343_m1   | <i>Cd68</i>                    |
| Mm01231183_m1   | <i>Cpt1<math>\alpha</math></i> |
| Mm00487218_m1   | <i>Cyp1a1</i>                  |
| Mm00487224_m1   | <i>Cyp1a2</i>                  |
| Mm01972453_s1   | <i>Cyp2b10</i>                 |
| Mm00731567_m1   | <i>Cyp3a11</i>                 |
| Mm02601690_gH   | <i>Cyp4a10</i>                 |
| Mm00484150_m1   | <i>Cyp7a1</i>                  |
| Mm00444340_m1   | <i>Fabp1</i>                   |
| Mm00662319_m1   | <i>Fasn</i>                    |
| Mm00436425_m1   | <i>Fxr</i>                     |
| Mm00839363_m1   | <i>G6pc</i>                    |
| Mm99999915_g1   | <i>G6pdh</i>                   |
| Mm00802655_m1   | <i>Gclc</i>                    |
| Mm00439154_m1   | <i>Gsr</i>                     |

|               |                                |
|---------------|--------------------------------|
| Mm01247712_m1 | <i>Hnf4<math>\alpha</math></i> |
| Mm00446190_m1 | <i>Il6</i>                     |
| Mm00443451_m1 | <i>Lxr<math>\alpha</math></i>  |
| Mm00459644_m1 | <i>Ly6gd</i>                   |
| Mm00782380_s1 | <i>Me1</i>                     |
| Mm01340842_m1 | <i>Mef2c</i>                   |
| Mm01253561_m1 | <i>Nqo1</i>                    |
| Mm00477784_m1 | <i>Nrf2</i>                    |
| Mm00443090_m1 | <i>Pklr</i>                    |
| Mm00440939_m1 | <i>Ppar<math>\alpha</math></i> |
| Mm00772290_m1 | <i>Scd1</i>                    |
| Mm00442278_m1 | <i>Shp</i>                     |
| Mm00550338_m1 | <i>Srebf1</i>                  |
| Mm01178820_m1 | <i>Tgf<math>\beta</math></i>   |
| Mm00445273_m1 | <i>Tlr4</i>                    |
| Mm00443258_m1 | <i>Tnf<math>\alpha</math></i>  |

**Table S3: Antibodies**

| <b>Antibody</b>                       | <b>Supplier</b>           | <b>Catalog #</b> |
|---------------------------------------|---------------------------|------------------|
| p-EGFR Y1173                          | Abcam                     | Ab5652           |
| EGFR                                  | Santa Cruz                | SC-03            |
| p-ERK 1/2                             | Cell Signaling Technology | 9101             |
| ERK 1/2                               | Cell Signaling Technology | 4695             |
| $\beta$ -actin                        | Cell Signaling Technology | 8457             |
| CAR                                   | Abcam                     | Ab186869         |
| LXR $\alpha$                          | Abcam                     | Ab176323         |
| NRF2                                  | Abcam                     | Ab156883         |
| p62                                   | Cell Signaling Technology | 23214            |
| HNF4 $\alpha$                         | Abcam                     | Ab201460         |
| PPAR $\alpha$                         | Abcam                     | Ab126285         |
| FXR                                   | Abcam                     | Ab129089         |
| S96 KAP2                              | Abcam                     | Ab32390          |
| KAP2                                  | Cell Signaling Technology | 3927             |
| CDK2                                  | Cell Signaling Technology | 18048            |
| Y15-CDK2                              | Abcam                     | Ab133463         |
| ACLY                                  | Cell Signaling Technology | 13390            |
| S455-ACLY                             | Cell Signaling Technology | 4331             |
| P-CDK Substrate                       | Cell Signaling Technology | 9477             |
| 2° HRP Antibody<br>(Goat anti Rabbit) | Cell Signaling Technology | 7074             |

**Table S4: Outliers for each measure and figure.**

| Tissue | Figure    | Measure           | # of Outliers |    |    |    |
|--------|-----------|-------------------|---------------|----|----|----|
|        |           |                   | CS            | CE | AS | AE |
| Liver  | Fig 1Bii  | % Sirius Red Area | 0             | 0  | 0  | 0  |
| Plasma | Fig 1Ci   | TNF $\alpha$      | 0             | 1  | 0  | 1  |
| Plasma | Fig 1Cii  | PAI-1             | 0             | 0  | 0  | 0  |
| Plasma | Fig 1Ciii | Resistin          | 2             | 2  | 0  | 2  |
| Liver  | Fig 1D    | Tnf $\alpha$      | 5             | 1  | 2  | 2  |
| Liver  | Fig 1D    | Il-6              | 0             | 2  | 0  | 0  |
| Liver  | Fig 1D    | Ly6g6d            | 0             | 0  | 0  | 0  |
| Liver  | Fig 1D    | Cd68              | 1             | 2  | 3  | 2  |
| Liver  | Fig 1D    | Tlr4              | 1             | 2  | 3  | 3  |
| Liver  | Fig 1E    | Tgf $\beta$       | 0             | 0  | 0  | 0  |
| Liver  | Fig 1E    | Mef2c             | 0             | 0  | 0  | 0  |
| Liver  | Fig 2A    | Steatosis         | 0             | 0  | 0  | 0  |
| Liver  | Fig 2Bi   | FFAs              | 1             | 2  | 0  | 4  |
| Liver  | Fig 2Bii  | Triglycerides     | 0             | 0  | 0  | 0  |
| Liver  | Fig 2Biii | Cholesterol       | 2             | 2  | 1  | 0  |
| Plasma | Fig 2Ci   | FFAs              | 2             | 3  | 0  | 2  |
| Plasma | Fig 2Cii  | Triglycerides     | 0             | 0  | 0  | 0  |
| Plasma | Fig 2Ciii | Cholesterol       | 0             | 0  | 0  | 0  |
| Plasma | Fig 2Di   | HDL               | 0             | 0  | 0  | 0  |
| Plasma | Fig 2Dii  | LDL               | 0             | 0  | 0  | 0  |
| Plasma | Fig 2Diii | VLDL              | 0             | 0  | 0  | 0  |
| Liver  | Fig 2Ev   | Apob              | 0             | 0  | 0  | 0  |
| WAT    | Fig 2Ei   | WAT wt            | 0             | 0  | 0  | 0  |
| Plasma | Fig 2Eii  | Adiponectin       | 0             | 5  | 0  | 0  |
| Plasma | Fig 3Bi   | Glucose           | 0             | 0  | 0  | 0  |
| Plasma | Fig 3Bii  | Pyruvate          | 2             | 3  | 1  | 1  |
| Plasma | Fig 3Cii  | GTT               | 0             | 0  | 0  | 0  |
| Plasma | Fig 3Dii  | ITT               | 0             | 0  | 0  | 0  |
| Liver  | Fig 4Ai   | CAR               | 0             | 0  | 0  | 0  |
| Liver  | Fig 4Aii  | Car               | 1             | 0  | 0  | 0  |
| Liver  | Fig 4Aii  | Cyp2b10           | 8             | 8  | 4  | 7  |
| Liver  | Fig 4Aii  | Cyp3a11           | 1             | 2  | 1  | 0  |
| Liver  | Fig 4Bi   | LXR $\alpha$      | 0             | 0  | 0  | 0  |
| Liver  | Fig 4Bii  | Lxr $\alpha$      | 0             | 0  | 0  | 0  |
| Liver  | Fig 4Bii  | Fasn              | 0             | 0  | 0  | 0  |
| Liver  | Fig 4Bii  | Srebf1            | 1             | 0  | 2  | 0  |
| Liver  | Fig 4Bii  | ApoE              | 2             | 2  | 0  | 2  |
| Liver  | Fig 4Ci   | HNF4 $\alpha$     | 0             | 0  | 0  | 0  |
| Liver  | Fig 4Cii  | Hnf4 $\alpha$     | 0             | 0  | 0  | 0  |
| Liver  | Fig 4Cii  | Pklr              | 0             | 0  | 1  | 0  |
| Liver  | Fig 4Cii  | G6pc              | 0             | 0  | 0  | 0  |
| Liver  | Fig 4Di   | NRF2              | 0             | 0  | 0  | 0  |
| Liver  | Fig 4Di   | P62               | 0             | 0  | 0  | 0  |
| Liver  | Fig 4Dii  | Nrf2              | 2             | 3  | 2  | 2  |
| Liver  | Fig 4Dii  | Nqo1              | 1             | 2  | 1  | 2  |
| Liver  | Fig 4Dii  | Me1               | 0             | 0  | 0  | 0  |
| Liver  | Fig 4Dii  | Gclc              | 0             | 0  | 0  | 0  |
| Liver  | Fig 4Dii  | Gsr               | 0             | 0  | 0  | 0  |
| Liver  | Fig 4Dii  | G6pdh             | 0             | 0  | 2  | 2  |
| Liver  | Fig S1A   | P-Y1173-EGFR      | 0             | 0  | 0  | 0  |
| Liver  | Fig S1A   | P-ERK1/2          | 0             | 0  | 0  | 0  |
| Liver  | Fig S1C   | P-Y1173-EGFR      | 0             | 0  | 0  | 0  |
| Blood  | Fig S2B   | Glucose 6hr       | 0             | 0  | 0  | 0  |
| Blood  | FigS2C    | Glucose 12hr      | 0             | 0  | 0  | 0  |
| Liver  | FigS3A    | FXR               | 0             | 0  | 0  | 0  |
| Liver  | FigS3A    | Fxr               | 0             | 0  | 0  | 1  |
| Liver  | FigS3A    | Cyp7a1            | 0             | 2  | 0  | 1  |
| Liver  | FigS3A    | Abcb11            | 0             | 0  | 0  | 0  |
| Liver  | FigS3A    | Shp               | 1             | 0  | 1  | 1  |
| Liver  | FigS3B    | Ahr               | 1             | 0  | 0  | 0  |
| Liver  | FigS3B    | Cyp1a1            | 0             | 0  | 0  | 0  |
| Liver  | FigS3B    | Cyp1a2            | 0             | 0  | 0  | 0  |

|       |        |                 |   |   |   |   |
|-------|--------|-----------------|---|---|---|---|
| Liver | FigS4A | S455-ACLY       | 0 | 0 | 0 | 0 |
| Liver | FigS4B | S96-KAP2        | 0 | 0 | 0 | 0 |
| Liver | FigS4C | Y15-CDK2        | 1 | 0 | 0 | 1 |
| Liver | FigS4C | P-CDK Substrate | 0 | 0 | 0 | 0 |

CS: Control+saline; CE: Control+EGF; AS: Aroclor1260+saline; AE: Aroclor1260+EGF

**Table S5: p-values**

| Tissue | Figure    | Measure                        | Two-Way ANOVA |         |             | Sidak's multiple comparison test |        |         |         |
|--------|-----------|--------------------------------|---------------|---------|-------------|----------------------------------|--------|---------|---------|
|        |           |                                | EGF           | Aroclor | Interaction | CSvsCE                           | CSvsAS | CEvsAE  | AS vsAE |
| Liver  | Fig 1Bii  | % Sirius Red Area              | 0.06          | 0.1     | 0.03        | 0.8                              | 0.02   | 0.6     | 0.005   |
| Plasma | Fig 1Ci   | TNF $\alpha$                   | 0.02          | 0.5     | 0.3         | 0.3                              | 0.2    | 0.8     | 0.02    |
| Plasma | Fig 1Cii  | PAI-1                          | 0.03          | 0.4     | 0.3         | 0.9                              | 0.04   | 0.9     | 0.02    |
| Plasma | Fig 1Ciii | Resistin                       | 0.03          | 0.7     | 0.6         | 0.05                             | 0.5    | 0.9     | 0.2     |
| Liver  | Fig 1D    | <i>Tnf<math>\alpha</math></i>  | 0.5           | 0.2     | 0.03        | 0.2                              | 0.02   | 0.3     | 0.04    |
| Liver  | Fig 1D    | <i>Il-6</i>                    | <0.0001       | 0.8     | 0.4         | 0.04                             | 0.1    | 0.8     | 0.0002  |
| Liver  | Fig 1D    | <i>Ly6g6d</i>                  | 0.001         | 0.2     | 0.2         | 0.2                              | 0.9    | 0.04    | 0.002   |
| Liver  | Fig 1D    | <i>Cd68</i>                    | 0.001         | 0.2     | 0.2         | 0.1                              | 0.9    | 0.06    | 0.002   |
| Liver  | Fig 1D    | <i>Tlr4</i>                    | 0.05          | 0.4     | 0.5         | 0.2                              | 0.9    | 0.02    | 0.002   |
| Liver  | Fig 1E    | <i>Tgf<math>\beta</math></i>   | 0.01          | 0.8     | 0.9         | 0.05                             | 0.6    | 0.8     | 0.1     |
| Liver  | Fig 1E    | <i>Mef2c</i>                   | 0.7           | 0.8     | 0.003       | 0.3                              | 0.01   | 0.2     | 0.008   |
| Liver  | Fig 2A    | Steatosis                      | 0.5           | 0.9     | 0.07        | 0.07                             | 0.3    | 0.1     | 0.4     |
| Liver  | Fig 2Bi   | FFAs                           | 0.01          | 0.02    | 0.1         | 0.4                              | 0.008  | 0.6     | 0.007   |
| Liver  | Fig 2Bii  | Triglycerides                  | 0.8           | 0.03    | 0.006       | 0.02                             | 0.7    | 0.004   | 0.3     |
| Liver  | Fig 2Biii | Cholesterol                    | 0.009         | 0.4     | 0.6         | 0.05                             | 0.9    | 0.8     | 0.04    |
| Plasma | Fig 2Ci   | FFAs                           | 0.3           | 0.9     | 0.7         | 0.4                              | 0.8    | 0.8     | 0.3     |
| Plasma | Fig 2Cii  | Triglycerides                  | 0.0003        | 0.0003  | 0.0005      | 0.9                              | 0.9    | <0.0001 | <0.0001 |
| Plasma | Fig 2Ciii | Cholesterol                    | 0.3           | 0.5     | 0.0002      | 0.03                             | 0.02   | 0.002   | 0.001   |
| Plasma | Fig 2Di   | HDL                            | 0.7           | 0.2     | 0.0002      | 0.002                            | 0.04   | 0.0007  | 0.01    |
| Plasma | Fig 2Dii  | LDL                            | 0.9           | 0.7     | 0.003       | 0.02                             | 0.05   | 0.02    | 0.05    |
| Plasma | Fig 2Diii | VLDL                           | 0.001         | 0.002   | 0.003       | 0.8                              | 0.9    | <0.0001 | <0.0001 |
| Liver  | Fig 2Ev   | <i>Apob</i>                    | 0.0006        | <0.0001 | <0.0001     | 0.5                              | 0.6    | <0.0001 | <0.0001 |
| WAT    | Fig 2Ei   | WAT wt                         | 0.9           | 0.9     | 0.02        | 0.1                              | 0.1    | 0.9     | 0.08    |
| Plasma | Fig 2Eii  | Adiponectin                    | 0.9           | 0.0009  | 0.007       | 0.06                             | 0.6    | <0.0001 | 0.05    |
| Plasma | Fig 3Bi   | Glucose                        | 0.007         | 0.8     | 0.4         | 0.2                              | 0.4    | 0.7     | 0.01    |
| Plasma | Fig 3Bii  | Pyruvate                       | 0.3           | <0.0001 | 0.3         | 0.9                              | 0.0001 | 0.008   | 0.2     |
| Plasma | Fig 3Cii  | GTT                            | 0.3           | 0.3     | 0.08        | 0.6                              | 0.6    | 0.06    | 0.06    |
| Plasma | Fig 3Dii  | ITT                            | 0.9           | 0.008   | 0.2         | 0.3                              | 0.4    | 0.3     | 0.006   |
| Liver  | Fig 4Ai   | CAR                            | 0.9           | 0.8     | 0.4         | 0.3                              | 0.6    | 0.4     | 0.5     |
| Liver  | Fig 4Aii  | <i>Car</i>                     | 0.04          | <0.0001 | 0.5         | 0.3                              | 0.02   | 0.0007  | 0.05    |
| Liver  | Fig 4Aii  | <i>Cyp2b10</i>                 | 0.7           | 0.1     | 0.008       | 0.9                              | 0.003  | 0.3     | 0.05    |
| Liver  | Fig 4Aii  | <i>Cyp3a11</i>                 | 0.2           | 0.04    | 0.3         | 0.9                              | 0.03   | 0.5     | 0.09    |
| Liver  | Fig 4Bi   | LXR $\alpha$                   | 0.1           | 0.06    | 0.04        | 0.7                              | 0.8    | 0.007   | 0.01    |
| Liver  | Fig 4Bii  | Lxr $\alpha$                   | 0.03          | 0.7     | 0.04        | 0.9                              | 0.09   | 0.3     | 0.004   |
| Liver  | Fig 4Bii  | <i>Fasn</i>                    | 0.03          | 0.6     | 0.1         | 0.6                              | 0.5    | 0.1     | 0.01    |
| Liver  | Fig 4Bii  | <i>Srebf1</i>                  | 0.003         | 0.03    | 0.02        | 0.6                              | 0.003  | 0.8     | 0.0003  |
| Liver  | Fig 4Bii  | <i>ApoE</i>                    | 0.05          | 0.3     | 0.9         | 0.1                              | 0.5    | 0.4     | 0.2     |
| Liver  | Fig 4Ci   | HNF4 $\alpha$                  | 0.04          | 0.6     | 0.6         | 0.2                              | 0.9    | 0.5     | 0.06    |
| Liver  | Fig 4Cii  | <i>Hnf4<math>\alpha</math></i> | 0.7           | 0.0007  | 0.6         | 0.6                              | 0.003  | 0.01    | 0.9     |
| Liver  | Fig 4Cii  | <i>Pklr</i>                    | 0.01          | 0.8     | 0.05        | 0.4                              | 0.4    | 0.1     | 0.003   |
| Liver  | Fig 4Cii  | <i>G6pc</i>                    | 0.3           | 0.02    | 0.9         | 0.5                              | 0.06   | 0.02    | 0.3     |
| Liver  | Fig 4Di   | NRF2                           | 0.5           | 0.05    | 0.1         | 0.4                              | 0.02   | 0.3     | 0.5     |
| Liver  | Fig 4Di   | P62                            | 0.9           | 0.04    | 0.7         | 0.7                              | 0.2    | 0.08    | 0.9     |
| Liver  | Fig 4Dii  | <i>Nrf2</i>                    | 0.02          | 0.4     | 0.8         | 0.1                              | 0.4    | 0.7     | 0.05    |
| Liver  | Fig 4Dii  | <i>Nqo1</i>                    | 0.007         | 0.007   | 0.5         | 0.09                             | 0.06   | 0.03    | 0.06    |
| Liver  | Fig 4Dii  | <i>Me1</i>                     | 0.06          | 0.04    | 0.4         | 0.4                              | 0.4    | 0.04    | 0.06    |
| Liver  | Fig 4Dii  | <i>Gclc</i>                    | 0.2           | 0.002   | 0.9         | 0.3                              | 0.02   | 0.03    | 0.4     |

|       |          |                 |         |         |        |       |        |         |         |
|-------|----------|-----------------|---------|---------|--------|-------|--------|---------|---------|
| Liver | Fig 4Dii | <i>Gsr</i>      | 0.02    | 0.01    | 0.0001 | 0.2   | 0.3    | <0.0001 | <0.0001 |
| Liver | Fig 4Dii | <i>G6pd</i>     | 0.9     | 0.004   | 0.9    | 0.9   | 0.04   | 0.03    | 0.9     |
| Liver | Fig S1C  | P-Y1173-EGFR    | 0.04    | 0.5     | 0.9    | 0.1   | 0.6    | 0.6     | 0.2     |
| Blood | Fig S2B  | Glucose 6hr     | 0.009   | 0.6     | 0.2    | 0.3   | 0.6    | 0.2     | 0.006   |
| Blood | FigS2C   | Glucose 12hr    | <0.0001 | 0.2     | 0.6    | 0.006 | 0.6    | 0.2     | 0.0007  |
| Liver | FigS3A   | FXR             | 0.8     | 0.04    | 0.3    | 0.4   | 0.04   | 0.4     | 0.6     |
| Liver | FigS3A   | <i>Fxr</i>      | 0.5     | 0.02    | 0.07   | 0.4   | 0.005  | 0.7     | 0.09    |
| Liver | FigS3A   | <i>Cyp7a1</i>   | 0.03    | <0.0001 | 0.8    | 0.08  | 0.0005 | 0.002   | 0.2     |
| Liver | FigS3A   | <i>Abcb11</i>   | 0.6     | 0.03    | 0.7    | 0.6   | 0.2    | 0.07    | 0.9     |
| Liver | FigS3A   | <i>Shp</i>      | 0.4     | 0.04    | 0.3    | 0.8   | 0.03   | 0.5     | 0.2     |
| Liver | FigS3B   | <i>Ahr</i>      | 0.1     | 0.4     | 0.6    | 0.2   | 0.8    | 0.4     | 0.5     |
| Liver | FigS3B   | <i>Cyp1a1</i>   | 0.03    | 0.4     | 0.4    | 0.3   | 0.9    | 0.2     | 0.04    |
| Liver | FigS3B   | <i>Cyp1a2</i>   | 0.08    | 0.8     | 0.7    | 0.3   | 0.6    | 0.9     | 0.1     |
| Liver | FigS4A   | S455-ACLY       | 0.3     | 0.05    | 0.4    | 0.5   | 0.2    | 0.8     | 0.9     |
| Liver | FigS4B   | S96-KAP2        | 0.8     | 0.2     | 0.6    | 0.9   | 0.8    | 0.9     | 0.9     |
| Liver | FigS4C   | Y15-CDK2        | 0.3     | 0.9     | 0.002  | 0.2   | 0.06   | 0.08    | 0.02    |
| Liver | FigS4C   | P-CDK Substrate | 0.2     | 0.2     | 0.9    | 0.7   | 0.8    | 0.7     | 0.9     |

CS: Control+saline; CE: Control+EGF; AS: Aroclor1260+saline; AE: Aroclor1260+EGF

**Table S6: Numerical Data**

| Tissue | Figure    | Measure                       | Numerical Data (mean ± SD) |                |                |               |
|--------|-----------|-------------------------------|----------------------------|----------------|----------------|---------------|
|        |           |                               | CS                         | CE             | AS             | AE            |
| Liver  | Fig 1Bii  | % Sirius Red Area             | 0.47 ± 0.38                | 0.59 ± 0.49    | 2.09 ± 2.37    | 0.26 ± 0.24   |
| Plasma | Fig 1Ci   | TNF $\alpha$                  | 3.72 ± 1.50                | 3.17 ± 1.24    | 4.42 ± 2.05    | 3.01 ± 1.38   |
| Plasma | Fig 1Cii  | PAI-1                         | 1848 ± 798.6               | 1794 ± 901.5   | 2665 ± 1611    | 1726 ± 834.1  |
| Plasma | Fig 1Ciii | Resistin                      | 2147 ± 700.5               | 1598 ± 796.2   | 1981 ± 957.8   | 1632 ± 483.5  |
| Liver  | Fig 1D    | <i>Tnf<math>\alpha</math></i> | 1 ± 0.67                   | 1.78 ± 1.5     | 2.62 ± 2.97    | 1.26 ± 0.99   |
| Liver  | Fig 1D    | <i>Il-6</i>                   | 1 ± 0.34                   | 0.47 ± 0.21    | 1.41 ± 1.39    | 0.41 ± 0.15   |
| Liver  | Fig 1D    | <i>Ly6g6d</i>                 | 1 ± 0.30                   | 0.82 ± 0.39    | 1.02 ± 0.49    | 0.60 ± 0.21   |
| Liver  | Fig 1D    | <i>Cd68</i>                   | 1 ± 0.32                   | 0.85 ± 0.30    | 1.01 ± 0.25    | 0.65 ± 0.23   |
| Liver  | Fig 1D    | <i>Tlr4</i>                   | 1 ± 0.32                   | 0.85 ± 0.30    | 1.01 ± 0.25    | 0.61 ± 0.16   |
| Liver  | Fig 1E    | <i>Tgf<math>\beta</math></i>  | 1 ± 0.35                   | 0.81 ± 0.22    | 0.94 ± 0.29    | 0.78 ± 0.27   |
| Liver  | Fig 1E    | <i>Mef2c</i>                  | 1 ± 0.20                   | 1.11 ± 0.29    | 1.27 ± 0.36    | 0.98 ± 0.31   |
| Liver  | Fig 2A    | Steatosis                     | 2.94 ± 1.0                 | 2.18 ± 1.33    | 2.42 ± 1.17    | 2.80 ± 1.21   |
| Liver  | Fig 2Bi   | FFAs                          | 1.78 ± 1.65                | 1.22 ± 1.14    | 3.74 ± 3.26    | 1.64 ± 0.78   |
| Liver  | Fig 2Bii  | Triglycerides                 | 0.68 ± 0.58                | 0.43 ± 0.32    | 0.64 ± 0.47    | 0.74 ± 0.60   |
| Liver  | Fig 2Biii | Cholesterol                   | 0.14 ± 0.03                | 0.19 ± 0.11    | 0.15 ± 0.06    | 0.22 ± 0.11   |
| Plasma | Fig 2Ci   | FFAs                          | 3.02 ± 0.06                | 2.85 ± 1.02    | 3.12 ± 1.05    | 2.78 ± 0.8    |
| Plasma | Fig 2Cii  | Triglycerides                 | 57.1 ± 9.2                 | 57.6 ± 14.2    | 57.7 ± 12.7    | 82.5 ± 16.4   |
| Plasma | Fig 2Ciii | Cholesterol                   | 130.1 ± 21.1               | 106.8 ± 45.2   | 104.5 ± 31.9   | 142.5 ± 20.7  |
| Plasma | Fig 2Di   | HDL                           | 90.5 ± 11.2                | 65.4 ± 26.1    | 74.0 ± 22.6    | 94.9 ± 7.4    |
| Plasma | Fig 2Dii  | LDL                           | 16.6 ± 5.9                 | 10.6 ± 5.9     | 11.6 ± 4.8     | 17.0 ± 3.3    |
| Plasma | Fig 2Diii | VLDL                          | 11.4 ± 1.9                 | 11.6 ± 2.7     | 11.5 ± 2.5     | 15.9 ± 3.3    |
| Liver  | Fig 2Ev   | <i>Apob</i>                   | 1 ± 0.16                   | 0.97 ± 0.13    | 1.03 ± 0.12    | 1.31 ± 0.12   |
| WAT    | Fig 2Ei   | WAT wt                        | 48.79 ± 11.37              | 39.98 ± 18.27  | 39.39 ± 17.51  | 49.54 ± 14.98 |
| Plasma | Fig 2Eii  | Adiponectin                   | 124599 ± 76047             | 166482 ± 12862 | 114621 ± 53966 | 73290 ± 56614 |

|        |          |                                |              |               |               |               |
|--------|----------|--------------------------------|--------------|---------------|---------------|---------------|
| Plasma | Fig 3Bi  | Glucose                        | 247.5 ± 78.9 | 296.6 ± 104.8 | 216.6 ± 87.7  | 311.6 ± 131.5 |
| Plasma | Fig 3Bii | Pyruvate                       | 264 ± 184.5  | 263.5 ± 71.45 | 668.7 ± 414.8 | 535.4 ± 264   |
| Plasma | Fig 3Cii | GTT                            | 31368 ± 3695 | 30632 ± 4933  | 30610 ± 3498  | 33444 ± 4074  |
| Plasma | Fig 3Dii | ITT                            | 16030 ± 2259 | 17392 ± 4186  | 14870 ± 4461  | 18906 ± 4752  |
| Liver  | Fig 4Ai  | CAR                            | 0.69 ± 0.27  | 0.62 ± 0.16   | 0.63 ± 0.16   | 0.72 ± 0.24   |
| Liver  | Fig 4Aii | <i>Car</i>                     | 1 ± 0.38     | 1.14 ± 0.47   | 1.34 ± 0.33   | 1.62 ± 0.37   |
| Liver  | Fig 4Aii | <i>Cyp2b10</i>                 | 1 ± 1.09     | 1.50 ± 2.47   | 130.9 ± 148.9 | 23.89 ± 36.69 |
| Liver  | Fig 4Aii | <i>Cyp3a11</i>                 | 1 ± 0.50     | 0.98 ± 0.29   | 1.46 ± 0.90   | 1.11 ± 0.46   |
| Liver  | Fig 4Bi  | LXR $\alpha$                   | 0.29 ± 0.20  | 0.24 ± 0.12   | 0.26 ± 0.07   | 0.64 ± 0.30   |
| Liver  | Fig 4Bii | <i>Lxr<math>\alpha</math></i>  | 1 ± 0.20     | 1.01 ± 0.19   | 0.89 ± 0.11   | 1.08 ± 0.17   |
| Liver  | Fig 4Bii | <i>Fasn</i>                    | 1 ± 0.23     | 1.04 ± 0.16   | 0.95 ± 0.23   | 1.16 ± 0.27   |
| Liver  | Fig 4Bii | <i>Srebf1</i>                  | 1 ± 0.44     | 1.08 ± 0.50   | 0.48 ± 0.14   | 1.11 ± 0.52   |
| Liver  | Fig 4Bii | <i>ApoE</i>                    | 1 ± 0.09     | 1.08 ± 0.17   | 0.97 ± 0.12   | 1.04 ± 0.15   |
| Liver  | Fig 4Ci  | HNF4 $\alpha$                  | 0.41 ± 0.20  | 0.61 ± 0.24   | 0.40 ± 0.12   | 0.73 ± 0.30   |
| Liver  | Fig 4Cii | <i>Hnf4<math>\alpha</math></i> | 1 ± 0.44     | 0.94 ± 0.39   | 0.61 ± 0.38   | 0.60 ± 0.25   |
| Liver  | Fig 4Cii | <i>Pklr</i>                    | 0.94 ± 0.41  | 1.08 ± 0.37   | 0.8 ± 0.30    | 1.34 ± 0.70   |
| Liver  | Fig 4Cii | <i>G6pc</i>                    | 1 ± 0.48     | 0.91 ± 0.38   | 0.73 ± 0.39   | 0.58 ± 0.29   |
| Liver  | Fig 4Di  | NRF2                           | 0.80 ± 0.17  | 0.67 ± 0.32   | 0.37 ± 0.14   | 0.48 ± 0.22   |
| Liver  | Fig 4Di  | P62                            | 0.56 ± 0.20  | 0.50 ± 0.15   | 0.75 ± 0.30   | 0.78 ± 0.25   |
| Liver  | Fig 4Dii | <i>Nrf2</i>                    | 1 ± 0.20     | 1.13 ± 0.25   | 0.93 ± 0.17   | 1.09 ± 0.24   |
| Liver  | Fig 4Dii | <i>Nqo1</i>                    | 1 ± 0.57     | 1.52 ± 0.83   | 1.61 ± 0.93   | 2.24 ± 1.04   |
| Liver  | Fig 4Dii | <i>Me1</i>                     | 1 ± 0.28     | 0.91 ± 0.43   | 0.90 ± 0.30   | 0.67 ± 0.25   |
| Liver  | Fig 4Dii | <i>Gclc</i>                    | 1 ± 0.19     | 0.91 ± 0.27   | 0.80 ± 0.19   | 0.73 ± 0.29   |
| Liver  | Fig 4Dii | <i>Gsr</i>                     | 1 ± 0.17     | 1.13 ± 0.42   | 1.11 ± 0.26   | 0.64 ± 0.28   |
| Liver  | Fig 4Dii | <i>G6pdh</i>                   | 1 ± 0.91     | 1.02 ± 0.82   | 0.38 ± 0.33   | 0.34 ± 0.28   |
| Liver  | Fig S1C  | P-Y1173-EGFR                   | 0.28 ± 0.12  | 0.52 ± 0.40   | 0.20 ± 0.09   | 0.44 ± 0.20   |
| Blood  | Fig S2B  | Glucose 6hr                    | 175.4 ± 15.6 | 184.5 ± 29.1  | 169.6 ± 37.8  | 197.8 ± 27.0  |
| Blood  | FigS2C   | Glucose 18hr                   | 161.1 ± 31.5 | 190.8 ± 25.7  | 167.2 ± 29.8  | 205.1 ± 32.9  |
| Liver  | FigS3A   | FXR                            | 0.50 ± 0.17  | 0.60 ± 0.22   | 0.75 ± 0.22   | 0.69 ± 0.28   |
| Liver  | FigS3A   | <i>Fxr</i>                     | 1 ± 0.24     | 1.09 ± 0.41   | 1.33 ± 0.35   | 1.13 ± 0.24   |
| Liver  | FigS3A   | <i>Cyp7a1</i>                  | 1 ± 0.69     | 2.28 ± 1.18   | 3.67 ± 2.06   | 4.68 ± 3.24   |
| Liver  | FigS3A   | <i>Abcb11</i>                  | 1.02 ± 0.13  | 1.05 ± 0.20   | 0.93 ± 0.21   | 0.93 ± 0.16   |
| Liver  | FigS3A   | <i>Shp</i>                     | 1 ± 0.60     | 1.08 ± 0.66   | 1.73 ± 1.34   | 1.30 ± 0.82   |
| Liver  | FigS3B   | <i>Ahr</i>                     | 0.92 ± 0.32  | 0.81 ± 0.21   | 0.94 ± 0.22   | 0.88 ± 0.17   |
| Liver  | FigS3B   | <i>Cyp1a1</i>                  | 1 ± 0.37     | 1.15 ± 0.48   | 0.99 ± 0.37   | 1.34 ± 0.50   |
| Liver  | FigS3B   | <i>Cyp1a2</i>                  | 1 ± 0.29     | 0.92 ± 0.24   | 1.05 ± 0.29   | 0.91 ± 0.17   |
| Liver  | FigS4A   | S455-ACLY                      | 1 ± 0.82     | 0.56 ± 0.40   | 0.35 ± 0.26   | 0.30 ± 0.10   |
| Liver  | FigS4B   | S96-KAP2                       | 1 ± 0.48     | 0.88 ± 0.34   | 0.72 ± 0.28   | 0.75 ± 0.26   |
| Liver  | FigS4C   | Y15-CDK2                       | 0.84 ± 0.05  | 1.05 ± 0.20   | 1.13 ± 0.20   | 0.77 ± 0.06   |
| Liver  | FigS4C   | P-CDK<br>Substrate             | 1 ± 0.27     | 1.41 ± 1.05   | 0.66 ± 0.40   | 0.96 ± 0.44   |

CS: Control+saline; CE: Control+EGF; AS: Aroclor1260+saline; AE: Aroclor1260+EGF

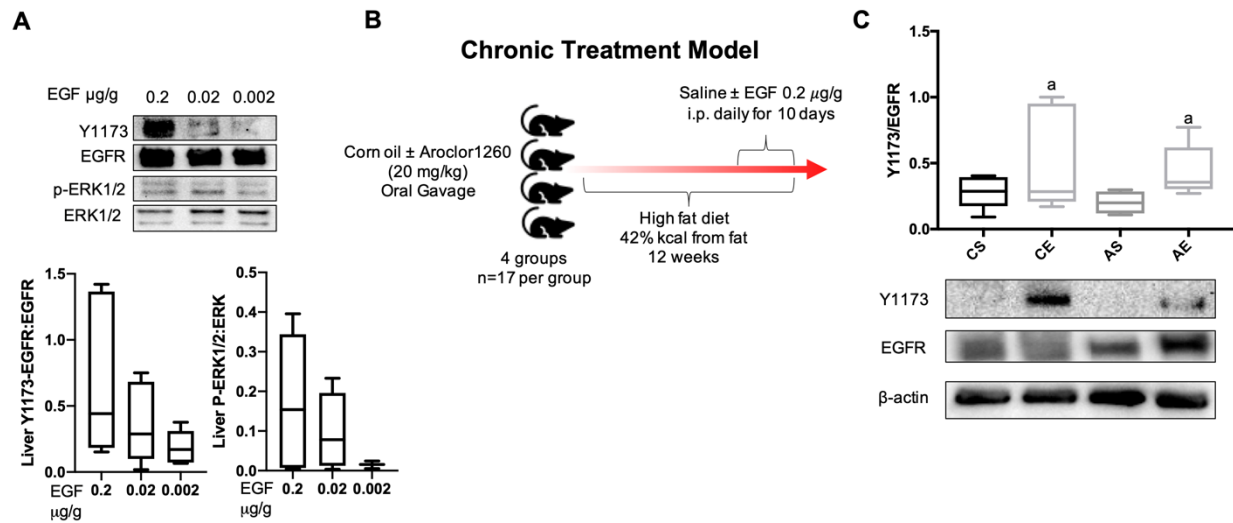

**Figure S1: Effects of acute EGF and chronic EGF and Aroclor1260 exposure on hepatic EGFR signaling.**

Male WT C57Bl/6 mice fed a control diet were treated with either saline or EGF at multiple doses (0.002, 0.02, 0.2  $\mu\text{g/g}$ ) followed by euthanasia at 30 minutes post i.p. injection and tissue harvest for downstream analysis. Male WT C57Bl/6 mice were fed a HFD (12 weeks) and exposed to either vehicle or Aroclor1260 (20mg/kg) by a one-time oral gavage at week 1. Aroclor1260 exposed or vehicle mice were treated (via i.p. injection) with saline or EGF (0.2  $\mu\text{g/g}$ ) daily for 10 days starting at week 10. Mice were fasted for 12 hours and euthanized and tissues harvested for downstream analyses. Figure S1: **A.** Western blot analysis of liver EGFR phosphorylation and ERK1/2 after i.p. of EGF at 0.002, 0.02, and 0.2  $\mu\text{g/g}$ . Phosphorylated proteins are normalized to total proteins. A representative western blot image is pictured. **B.** Diagram of chronic treatment animal model. **C.** Hepatic EGFR phosphorylation was evaluated in mice exposed to corn oil and injected with either saline (CS) or EGF (0.2  $\mu\text{g/g}$ ) (CE) or gavaged with Aroclor1260 (20 mg/kg) and injected with saline (AS) or EGF (AE) (chronic). Phosphorylated



EGFR was normalized to total EGFR. A representative western blot image is pictured. An n=5 was used for this figure. A two-way ANOVA was used to statistically compare datasets followed by a one-way ANOVA with a Sidak correction for intergroup comparisons. A  $p < 0.05$  was considered significant. Significance due to EGF is denoted by (a), due to Aroclor1260 denoted by (b), and due to interaction denoted by (c) for the two-way ANOVA. Data are presented as box and whisker plots for figure S1B which illustrate the median (midline), upper and lower quartiles (box) and the upper and lower limits (whiskers). All numerical data are presented in supplemental materials Table S6 as mean  $\pm$  SD and p-values can be found in Table S5. **Abbreviations:** CS: Control+saline; CE: Control+EGF; AS: Aroclor1260+Saline; AE: Aroclor1260+EGF; EGF: epidermal growth factor; EGFR: Epidermal growth factor receptor.

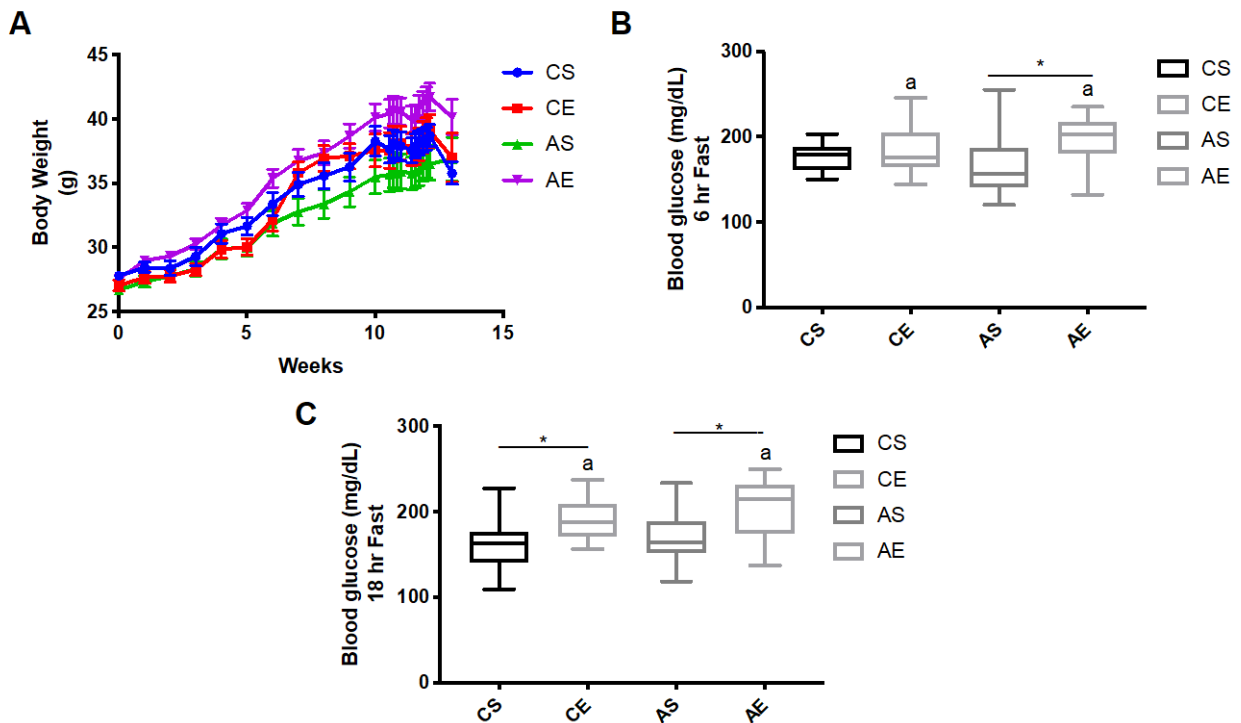

**Figure S2: Effects of chronic EGF and Aroclor 1260 exposure on fasted glucose levels at 6 and 12 hours.**

Male WT C57Bl/6 mice were fed a HFD (12 weeks) and exposed to either vehicle or Aroclor1260 (20mg/kg) by a one-time oral gavage at week 1. Aroclor1260 exposed or vehicle mice were treated (via i.p. injection) with saline or EGF (0.2  $\mu$ g/g) daily for 10 days starting at week 10. Mice were fasted for 6 and 18 hours and blood was sampled for measuring blood glucose levels. Figure S2: **A.** Body weight of mice during the course of the study. **B.** Blood glucose after 6 hour fast. **C.** Blood glucose after 12 hour fast. An n=17 was used for this figure. A two-way ANOVA was used to statistically compare datasets followed by a Sidak correction for intergroup comparisons. A  $p < 0.05$  was considered significant. Significance due to EGF is denoted by (a), due to Aroclor1260 denoted by (b), and due to interaction denoted by (c) for the two-way ANOVA. A  $p < 0.05$  was denoted by \* for the Sidak multiple comparison test. Data are presented as mean  $\pm$  SEM for Fig S2A. Data are presented as box and whisker plots for figure S2B-C which illustrate the median (midline), upper and lower quartiles (box) and the upper and lower limits (whiskers). All numerical data are presented in supplemental materials Table S6 as mean  $\pm$  SD and p-values can be found in Table S5. **Abbreviations:** CS: Control+saline; CE: Control+EGF; AS: Aroclor1260+Saline; AE: Aroclor1260+EGF; EGF: epidermal growth factor.



considered significant. A  $p < 0.05$  is denoted by \* for the Sidak multiple comparison test. Significance due to EGF is denoted by (a), due to Aroclor1260 denoted by (b), and due to interaction denoted by (c) for the two-way ANOVA. Data are presented as box and whisker plots for figure S3 which illustrate the median (midline), upper and lower quartiles (box) and the upper and lower limits (whiskers). All numerical data are presented in supplemental materials Table S6 as mean  $\pm$  SD and p-values can be found in Table S5. Numeric outliers were identified by ROUT method and removed. The number of outliers are reported in Table S4. **Abbreviations:** CS: Control+saline; CE: Control+EGF; AS: Aroclor1260+Saline; AE: Aroclor1260+EGF; EGF: epidermal growth factor; FXR: Farnesoid X receptor; Cyp7a1: Cytochrome P450 7A1; Abcb11: ATP binding cassette B11; Shp: Small heterodimer partner; Ahr: Aryl hydrocarbon receptor; Cyp1a1: Cytochrome P450 1A1; Cyp1a2: Cytochrome P450 1A2; p62: Sequestosome 1.

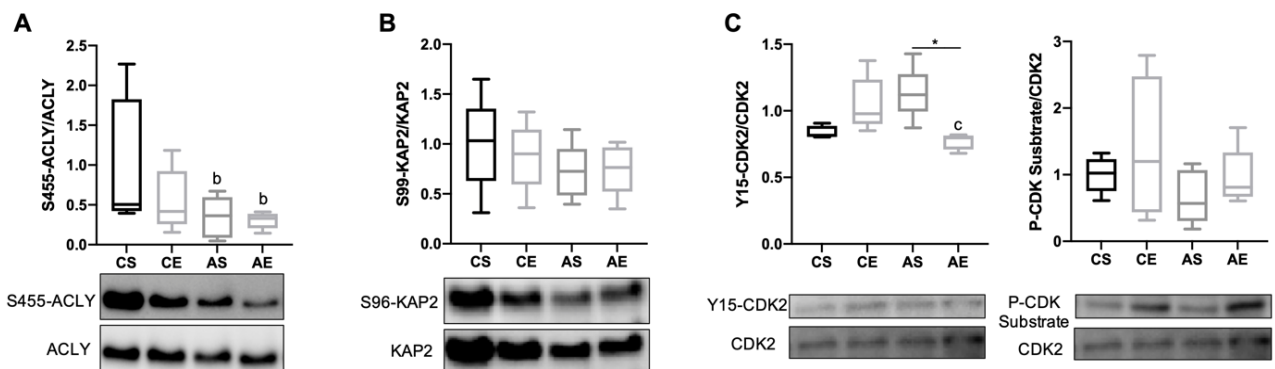

**Figure S4: Effect of chronic EGF and A1260 exposure on hepatic phosphoproteomic targets.**

Male WT C57Bl/6 mice were fed a HFD (12 weeks) and exposed to either vehicle or Aroclor1260 (20mg/kg) by a one-time oral gavage at week 1. Aroclor1260 exposed or vehicle mice were treated (via i.p. injection) with saline or EGF (0.2  $\mu$ g/g) daily for 10 days starting at week 10.

Mice were fasted for 12 hours and euthanized and tissues harvested for downstream

analyses. Figure S4. **A.** Western blot analysis measuring hepatic S455-ACLY normalized to total ACLY, **B.** S96-KAP2 normalized to KAP2, and **C.** Y15-CDK2 and P-CDK substrate normalized to CDK2. A n=5 was used for the western blot analysis data. A two-way ANOVA was used to statistically compare datasets followed by a Sidak correction for intergroup comparisons. A  $p < 0.05$  was considered significant. A  $p < 0.05$  is denoted by \*. Significance due to EGF is denoted by (a), due to Aroclor1260 denoted by (b), and due to interaction denoted by (c) for the two-way ANOVA. Data are presented as box and whisker plots for figure S4 which illustrate the median (midline), upper and lower quartiles (box) and the upper and lower limits (whiskers). All numerical data are presented in supplemental materials Table S6 as mean  $\pm$  SD and p-values can be found in Table S5. Numeric outliers were identified by ROUT method and removed. The number of outliers are reported in Table S4. **Abbreviations:** CS: Control+saline; CE: Control+EGF; AS: Aroclor1260+Saline; AE: Aroclor1260+EGF; EGF: epidermal growth factor; ACLY: ATP citrate synthase; KAP2: Protein kinase CAMP-dependent type II regulatory subunit; CDK2: Cyclin dependent kinase 2; CDK: Cyclin dependent kinase.
