# Supplementary material
Source: PubMed Central journal article supplement (PMC8011667)
Supplement: ehp8222.smcontents.508.pdf [file ehp8222.smcontents.508.pdf]

**Note to readers with disabilities:** *EHP* strives to ensure that all journal content is accessible to all readers. However, some figures and Supplemental Material published in *EHP* articles may not conform to [508 standards](#) due to the complexity of the information being presented. If you need assistance accessing journal content, please contact [ehp508@niehs.nih.gov](mailto:ehp508@niehs.nih.gov). Our staff will work with you to assess and meet your accessibility needs within 3 working days.

### **Supplemental Material**

#### **Effect of Epidermal Growth Factor Treatment and Polychlorinated Biphenyl Exposure in a Dietary-Exposure Mouse Model of Steatohepatitis**

Josiah E. Hardesty, Banrida Wahlang, Russell A. Prough, Kim Z. Head, Daniel Wilkey, Michael Merchant, Hongxue Shi, Jian Jin, and Matthew C. Cave

#### **Table of Contents**

**Table S1.** PCB Congener Composition of Aroclor1260 (Adapted from ATSDR CDC).

**Table S2.** Taqman Probes.

**Table S3.** Antibodies.

**Table S4.** Outliers for each measure and figure.

**Table S5.** p-values.

**Table S6.** Numerical Data.

**Figure S1.** Effects of acute EGF and chronic EGF and Aroclor1260 exposure on hepatic EGFR signaling.

**Figure S2.** Effects of chronic EGF and Aroclor 1260 exposure on fasted glucose levels at 6 and 12 hours.

**Figure S3.** Effects of chronic EGF and Aroclor 1260 exposure on hepatic FXR and AhR expression and target genes.

**Figure S4.** Effect of chronic EGF and A1260 exposure on hepatic phosphoproteomic targets.

**Additional File-** Excel Document
